# Supplementary material for: Nano-kaolin/Ti4+/Fe3O4: a magnetic reusable nano-catalyst for the synthesis of pyrimido[2,1-b]benzothiazoles
Source: Royal Society of Chemistry journal article supplement (doi:10.1039/c9ra01767d), 2019-01-01
Supplement: c9ra01767d1.pdf [file c9ra01767d1.pdf]

## Nano-kaolin/Ti<sup>4+</sup>/Fe<sub>3</sub>O<sub>4</sub>: a magnetic reusable nano-catalyst for the synthesis of pyrimido[2,1-*b*]benzothiazoles

Bi Bi Fatemeh Mirjalili,\* Roya Soltani

Department of Chemistry, College of Science, Yazd University, Yazd, P.O.Box 89195-741, Iran,  
E-mail: fmirjalili@yazd.ac.ir  
Telephone: +983531232672, Fax: +98 3538210644

**Ethyl-2-methyl-4-(phenyl)-4*H*-pyrimido[2,1-*b*][1,3]benzothiazole-3-carboxylate (table 2, IV<sub>a</sub>).**

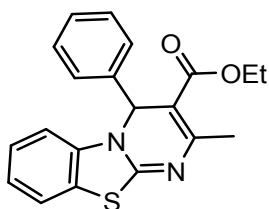

Pale yellow solid. <sup>1</sup>H NMR (Acetone-*d*<sub>6</sub>, 400 MHz): δ 7.70 (dd, *J*=8, 0.8 Hz, 1H), 7.52-7.54 (m, 2H), 7.40 (dd, *J*=8, 1.2 Hz, 1H), 7.30-7.35 (m, 3H), 7.19-7.26 (m, 2H), 6.54 (s, 1H), 4.07-4.20 (m, 2H), 2.38 (s, 3H), 1.27 (t, 3H, *J*=7.2 Hz). <sup>13</sup>C NMR (DMSO-*d*<sub>6</sub>, 400 MHz): 165.9, 163.1, 154.5, 142.0, 138.0, 129.0, 128.7, 127.4, 127.2, 124.5, 123.3, 112.7, 103.2, 59.9, 57.1, 23.6, 14.5, δ IR (KBr): 2974, 1669, 1594, 1460, 1242, 747 cm<sup>-1</sup>. mp: 178-180 °C.

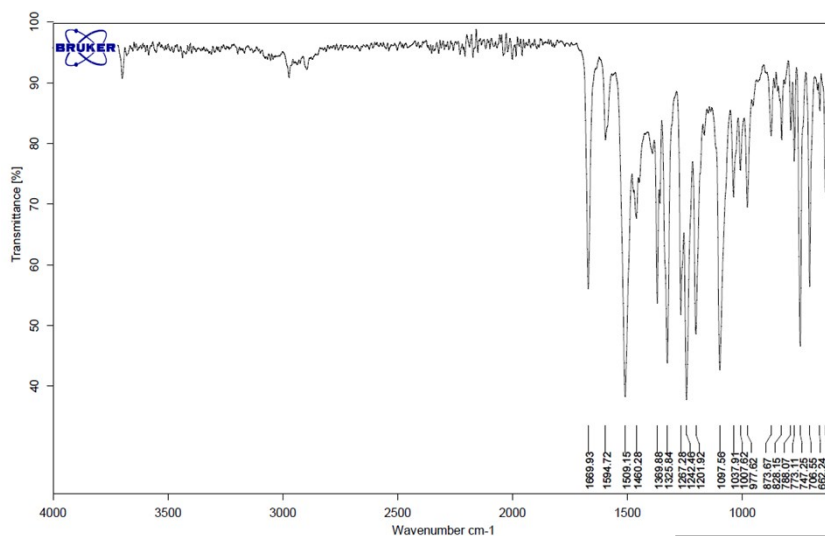

The FT-IR spectrum of product (IV<sub>a</sub>)

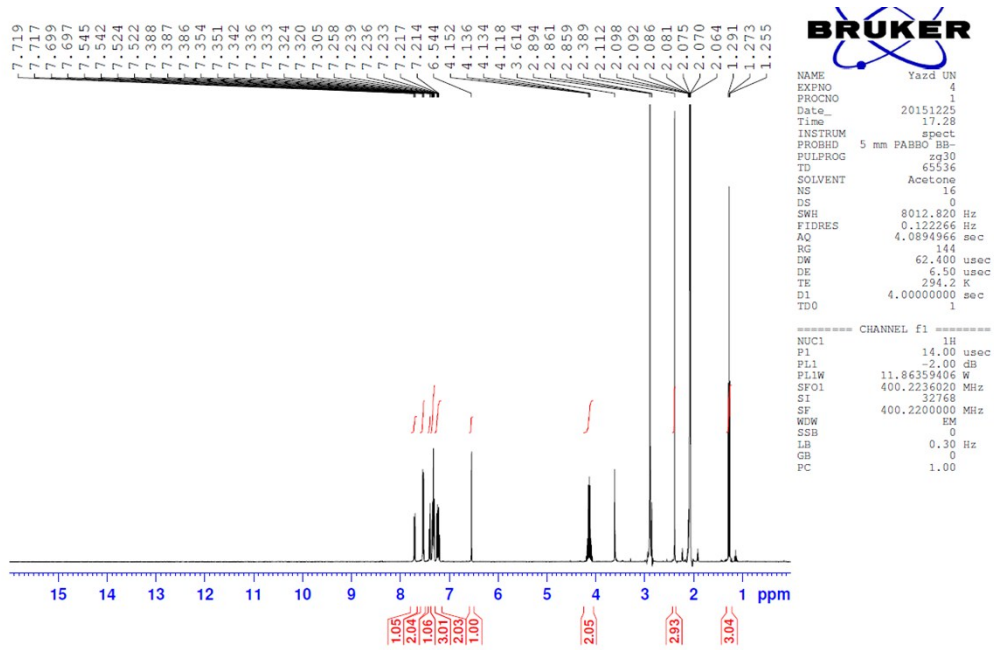

The <sup>1</sup>H NMR (400MHz) spectrum of product (IV<sub>a</sub>)

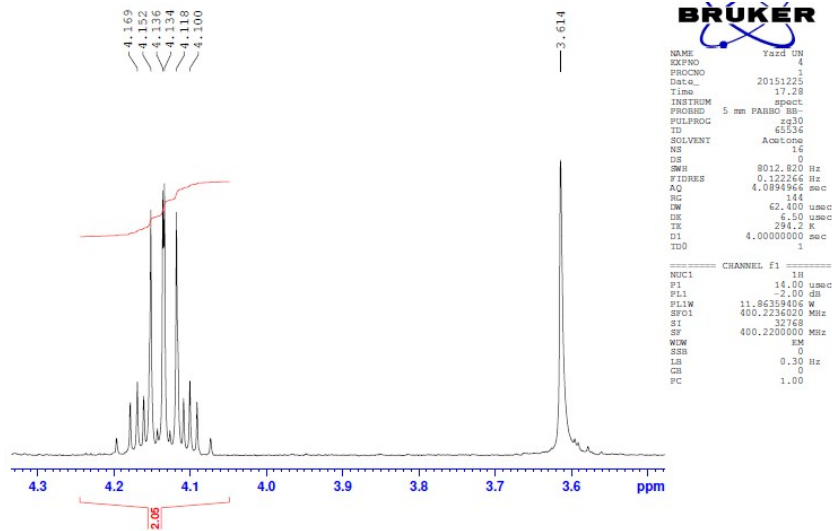

The <sup>1</sup>H NMR (400MHz) spectrum of product (IV<sub>a</sub>)

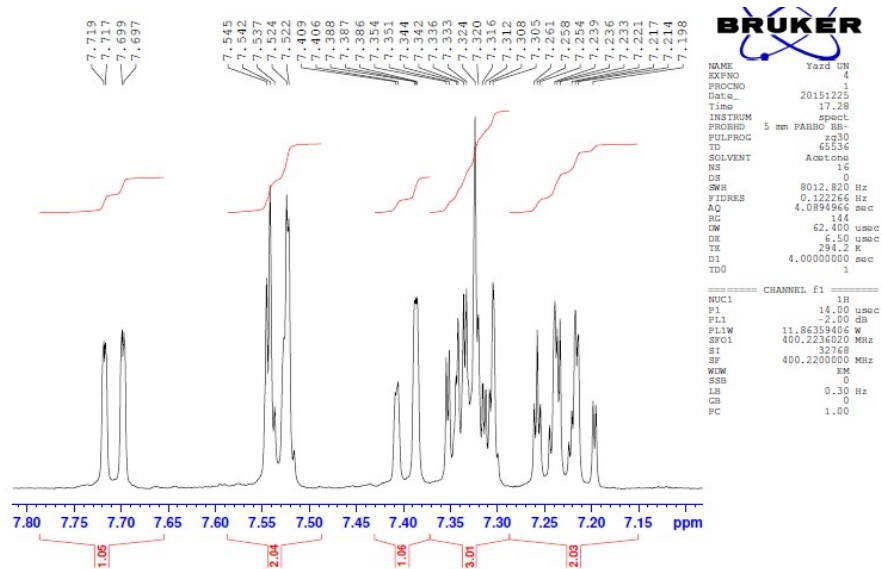

The  $^1\text{H}$  NMR (400MHz) spectrum of product (IV<sub>a</sub>)

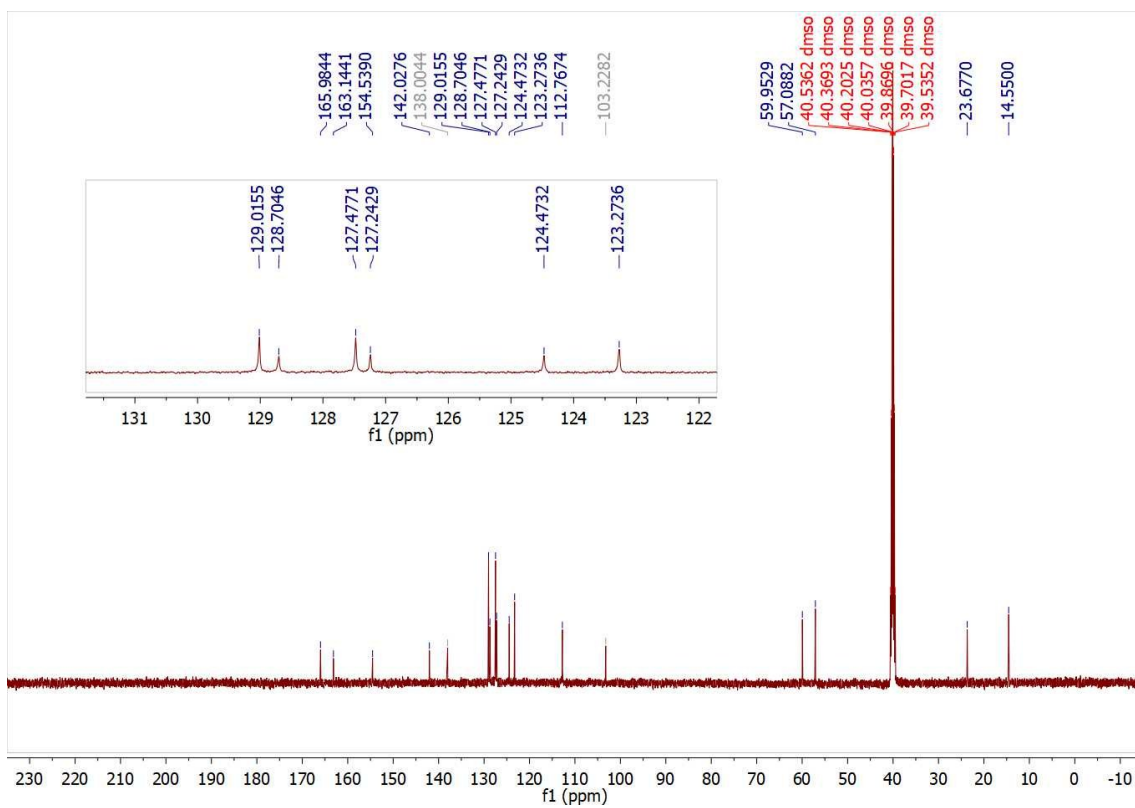

The  $^{13}\text{C}$  NMR (400MHz) spectrum of product (IV<sub>a</sub>)

## Ethyl-2-methyl-4-(4-nitrophenyl)-4*H*-pyrimido[2,1-*b*][1,3]benzothiazole-3-carboxylate

(table 2, IV<sub>b</sub>).

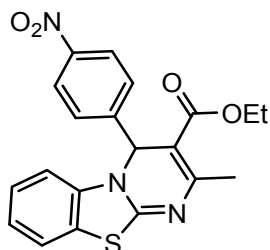

Yellow solid. <sup>1</sup>H NMR (Acetone-d<sub>6</sub>, 400 MHz): δ 8.18 (d, *J*=8.8 Hz, 2H), 7.80 (d, *J*=8 Hz, 2H), 7.72 (d, *J*=8 Hz, 1H), 7.41 (d, *J*=8 Hz, 1H), 7.32 (t, *J*=8 Hz, 1H), 7.22 (t, *J*=7.2 Hz, 1H), 6.69 (s, 1H), 4.09-4.16 (m, 2H), 2.37 (s, 3H), 1.25 (t, *J*=7.2 Hz, 3H). <sup>13</sup>C NMR (DMSO-d<sub>6</sub>, 400 MHz): δ 165.7, 163.4, 155.5, 151.7, 148.6, 137.7, 128.9, 127.4, 124.7, 124.3, 123.4, 123.2, 112.7, 102.3, 60.1, 56.4, 23.8, 14.5, IR (KBr): 3074, 2981, 1700, 1670, 1585, 1501, 1347, 1272, 1242, 1202, 745 cm<sup>-1</sup>. mp: 171-173 °C.

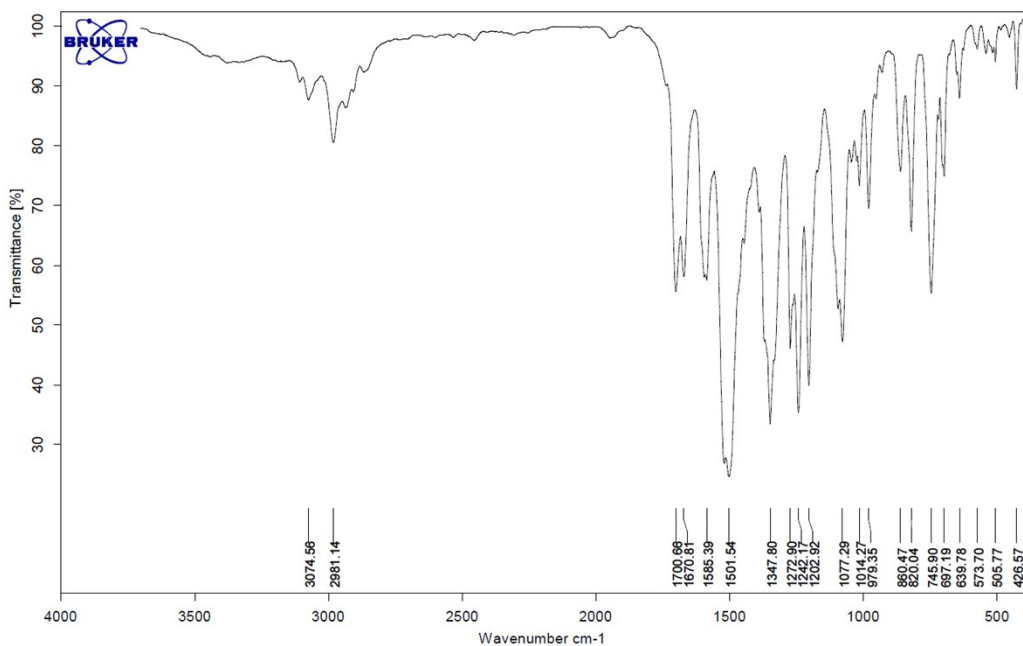

The FT-IR spectrum of product (IV<sub>b</sub>)

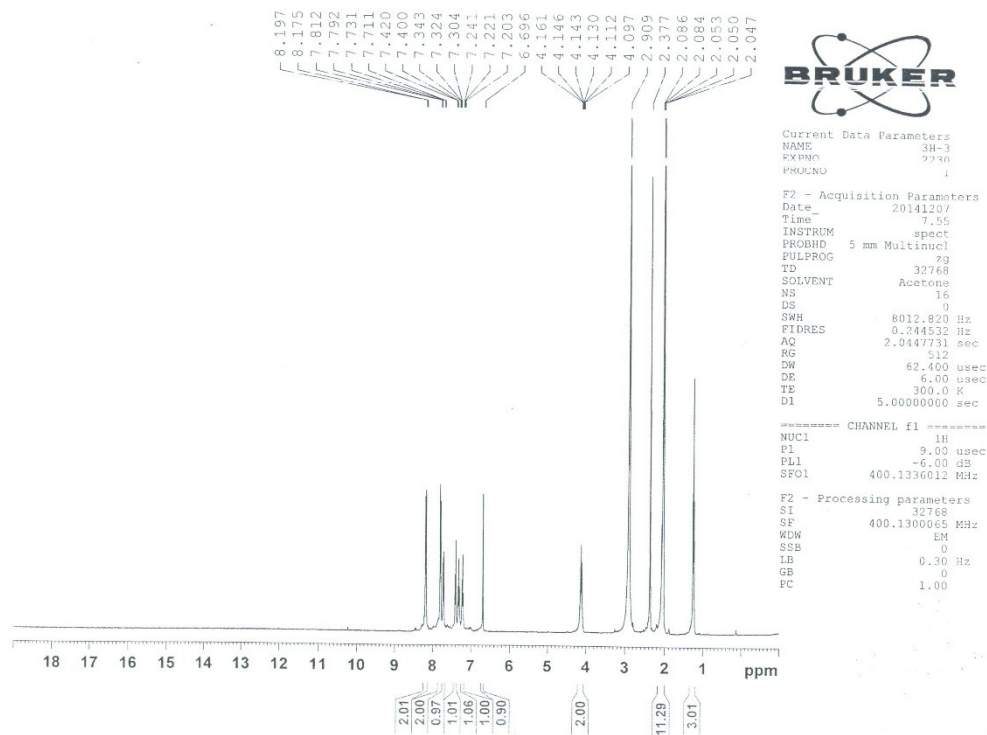

The  $^1\text{H}$  NMR (400MHz) spectrum of product (IV<sub>b</sub>)

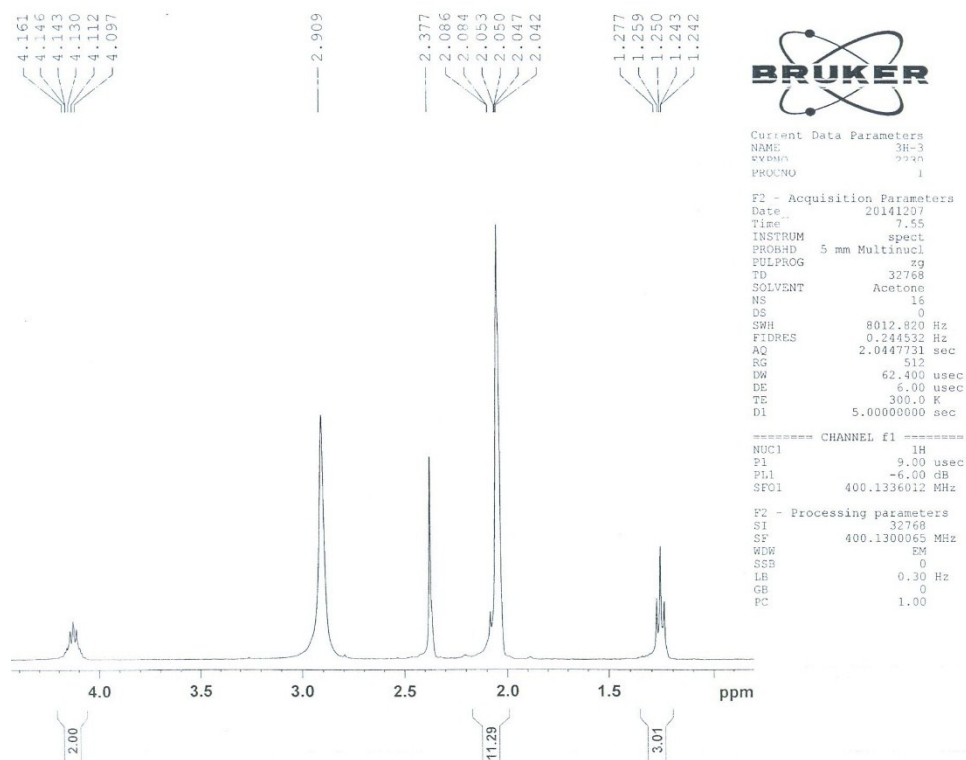

The  $^1\text{H}$  NMR (400MHz) spectrum of product (IV<sub>b</sub>)

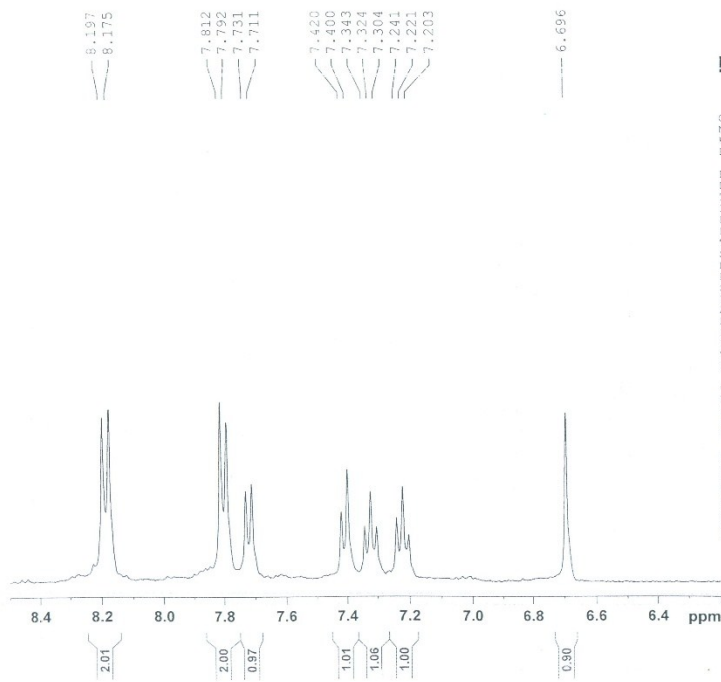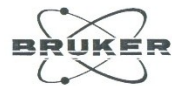

```

Current Data Parameters
NAME      2H-3
VERSION   2000
PROCNO    1

F2 - Acquisition Parameters
Date_     20141207
Time      7.55
INSTRUM   spect
PROBHD    5 mm Multinucl
PULPROG   zg
TD         32768
SOLVENT   Acetone
NS         16
DS         0
SWH        8012.820 Hz
FIDRES     0.244532 Hz
AQ         2.0447731 sec
RG         312
DW         62.400 usec
DE         6.00 usec
TE         300.0 K
D1         5.00000000 sec

----- CHANNEL f1 -----
NUC1       1H
P1         9.00 usec
PL1        -6.00 dB
SFO1       400.1336015 MHz

F2 - Processing parameters
SI         32768
SF         400.1300065 MHz
WDW        EM
SSB        0
LB         0.10 Hz
GB         0
PC         1.00

```

The <sup>1</sup>H NMR (400MHz) spectrum of product (IV<sub>b</sub>)

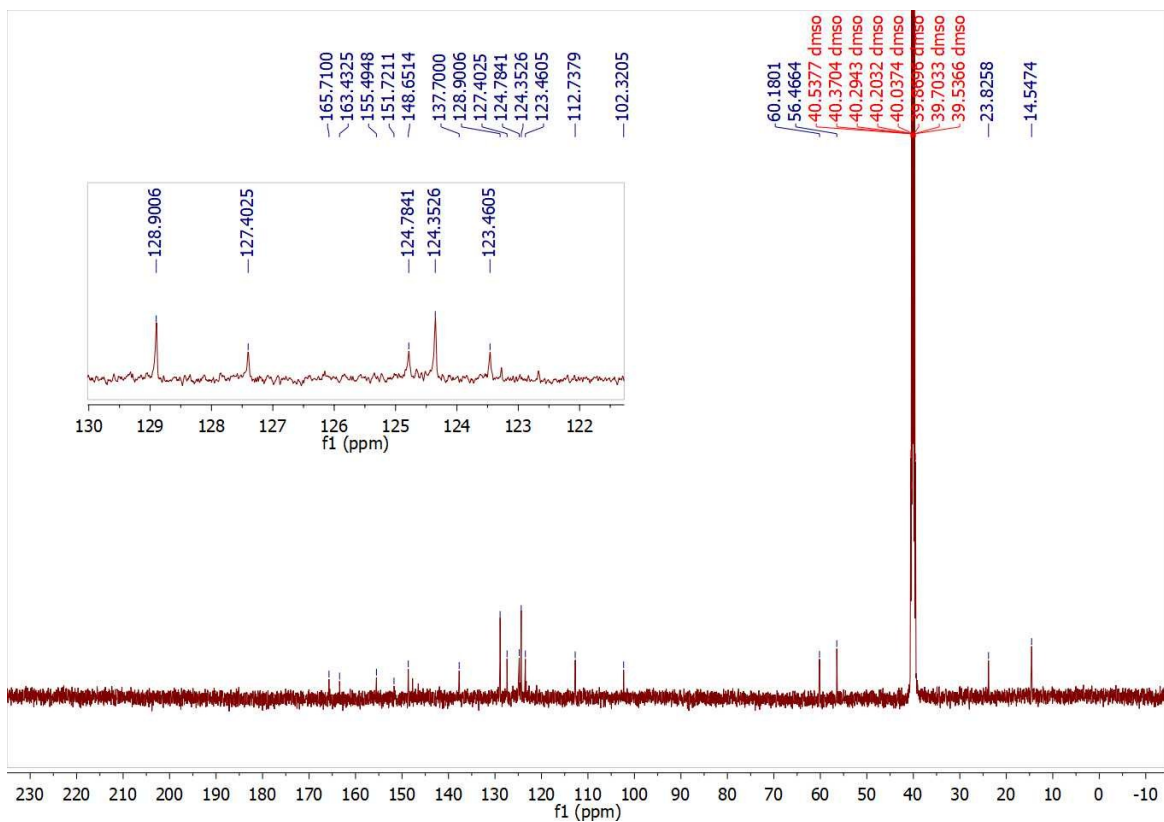

The  $^{13}\text{C}$  NMR (400MHz) spectrum of product (IV<sub>b</sub>)

**Ethyl-2-methyl-4-(4-chlorophenyl)-4H-pyrimido[2,1-*b*][1,3]benzothiazole-3-carboxylate**  
(table 2, IV<sub>c</sub>).

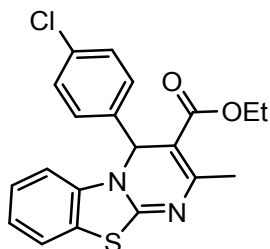

Yellow solid.  $^1\text{H}$  NMR (Acetone- $d_6$ , 400 MHz):  $\delta$  7.70 (d,  $J=8$  Hz, 1H), 7.50-7.55 (m, 2H), 7.30-7.41 (m, 4H), 7.21 (td,  $J=7.2, 1.2$  Hz, 1H), 6.54 (s, 1H), 4.05-4.12 (m, 2H), 2.36 (s, 3H), 1.20-1.30 (m, 3H).  $^{13}\text{C}$  NMR (DMSO- $d_6$ , 400 MHz): 165.8, 163.1, 154.9, 140.9, 137.8, 133.3, 129.4, 129.1, 127.2, 124.6, 123.2, 112.7, 102.8, 60.1, 56.4, 23.7, 14.5, IR (KBr): 2978, 1687, 1580, 1488, 1239, 1200, 1074, 833, 743  $\text{cm}^{-1}$ . mp: 87-89  $^\circ\text{C}$ .

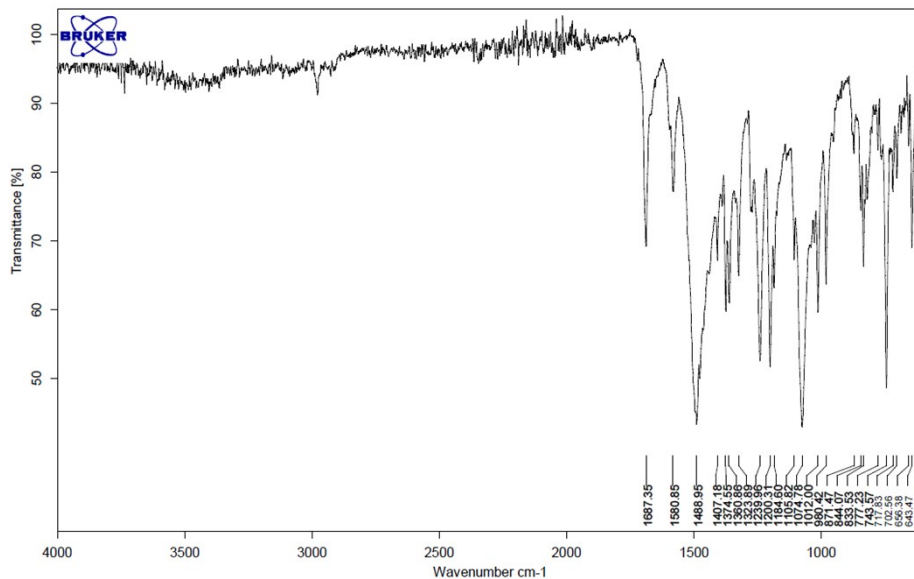

The FT-IR spectrum of product (IV<sub>c</sub>)

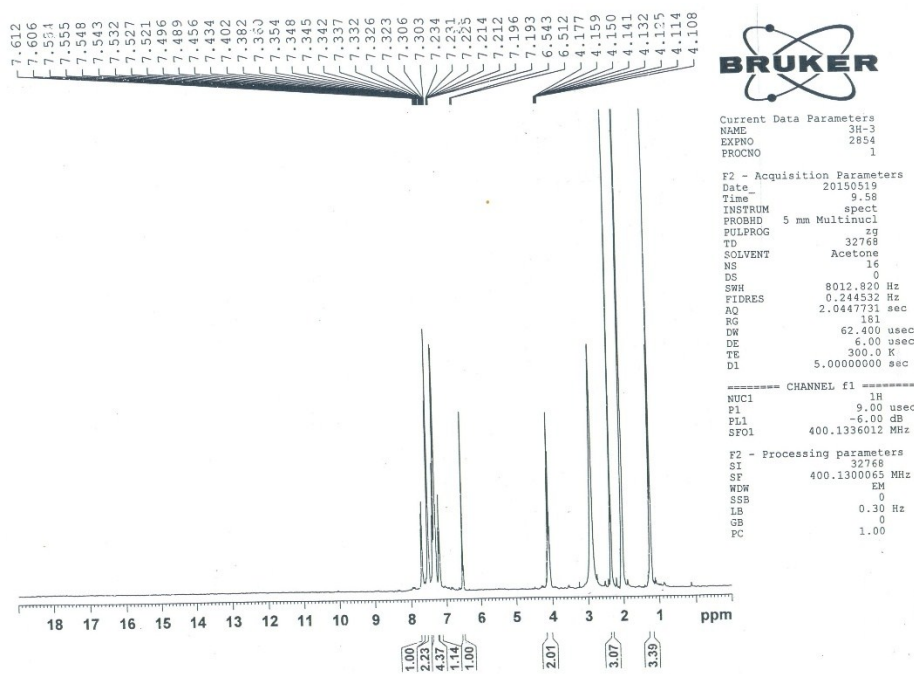

The <sup>1</sup>H NMR (400MHz) spectrum of product (IV<sub>c</sub>)



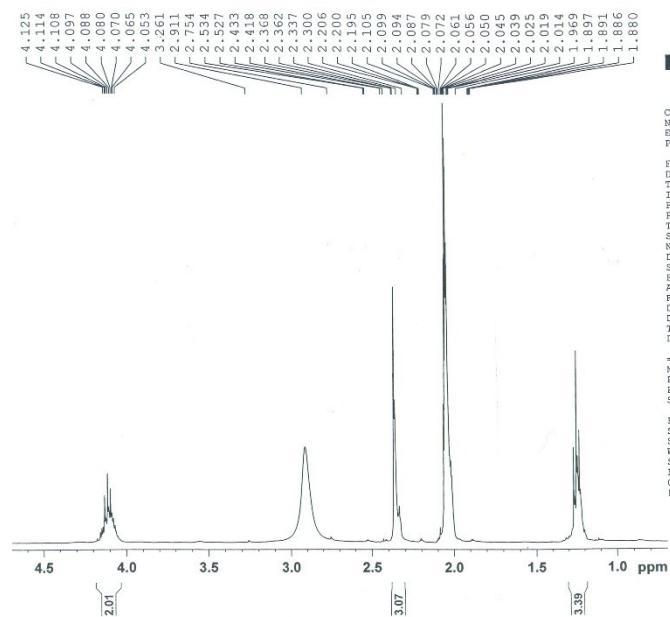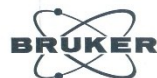

Current Data Parameters  
 NAME 3H-3  
 EXNO 2854  
 PROCNO 1

F2 - Acquisition Parameters  
 Date 20150519  
 Time 9.58  
 INSTRUM spect  
 PROBHD 5 mm Multinucl  
 PULPROG zg  
 TD 32768  
 SOLVENT Acetone  
 NS 16  
 DS 0  
 SWH 8012.820 Hz  
 FIDRES 0.244532 Hz  
 AQ 2.0447731 sec  
 RG 181  
 DW 62.400 usec  
 DE 6.00 usec  
 TE 300.0 K  
 D1 5.0000000 sec

===== CHANNEL f1 =====  
 NUC1 1H  
 P1 9.00 usec  
 PL1 -6.00 dB  
 SFO1 400.1336012 MHz

F2 - Processing parameters  
 SI 32768  
 SF 400.1300065 MHz  
 WDW EM  
 SSB 0  
 LB 0.30 Hz  
 GB 0  
 PC 1.00

The  $^1\text{H}$  NMR (400MHz) spectrum of product (IV<sub>c</sub>)

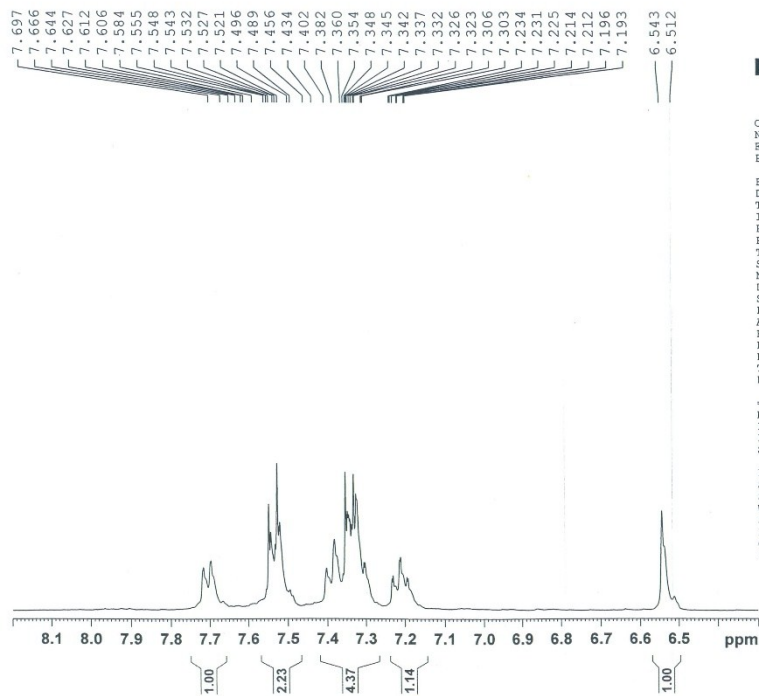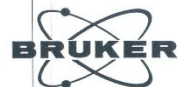

Current Data Parameters  
 NAME 3H-3  
 EXNO 2854  
 PROCNO 1

F2 - Acquisition Parameters  
 Date 20150519  
 Time 9.58  
 INSTRUM spect  
 PROBHD 5 mm Multinucl  
 PULPROG zg  
 TD 32768  
 SOLVENT Acetone  
 NS 16  
 DS 0  
 SWH 8012.820 Hz  
 FIDRES 0.244532 Hz  
 AQ 2.0447731 sec  
 RG 181  
 DW 62.400 usec  
 DE 6.00 usec  
 TE 300.0 K  
 D1 5.0000000 sec

===== CHANNEL f1 =====  
 NUC1 1H  
 P1 9.00 usec  
 PL1 -6.00 dB  
 SFO1 400.1336012 MHz

F2 - Processing parameters  
 SI 32768  
 SF 400.1300065 MHz  
 WDW EM  
 SSB 0  
 LB 0.30 Hz  
 GB 0  
 PC 1.00

The  $^1\text{H}$  NMR (400MHz) spectrum of product (IV<sub>c</sub>)



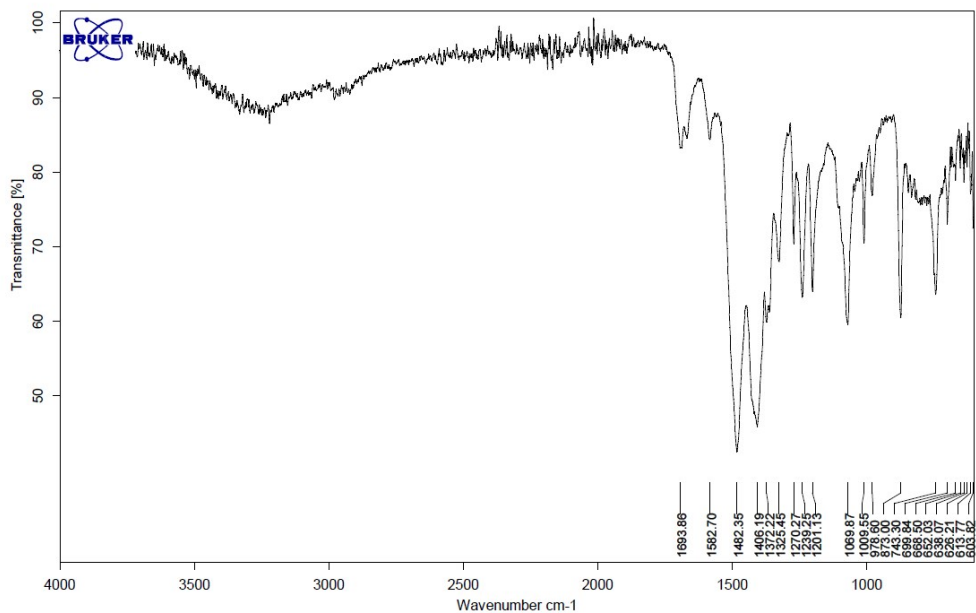

The FT-IR spectrum of product (IV<sub>d</sub>)

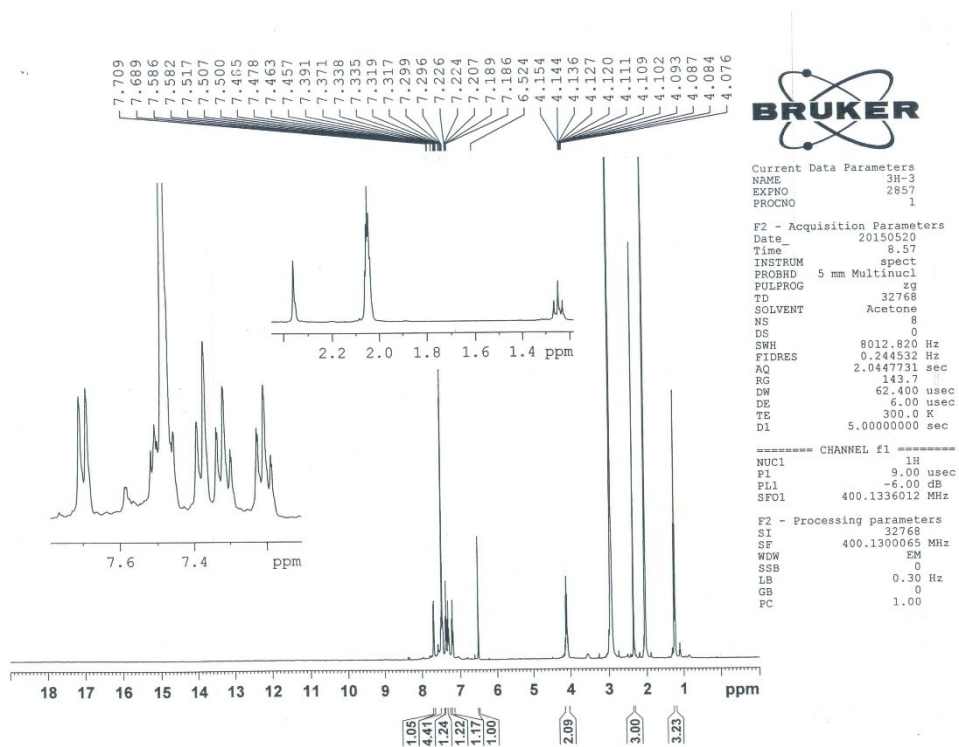

The <sup>1</sup>H NMR (400MHz) spectrum of product (IV<sub>d</sub>)

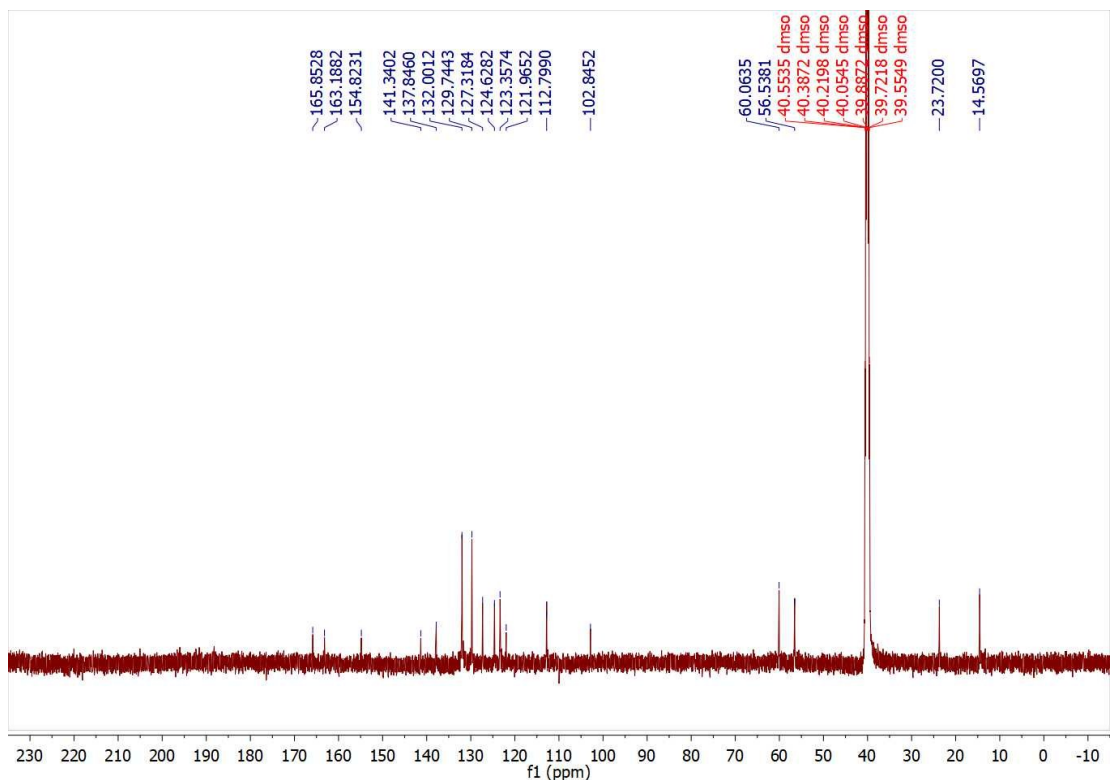

The  $^{13}\text{C}$  NMR (400MHz) spectrum of product (IV<sub>d</sub>)

**Ethyl-2-methyl-4-(4-hydroxy phenyl)-4*H*-pyrimido[2,1-*b*][1,3]benzothiazole-3-carboxylate**  
(table 2, IV<sub>e</sub>).

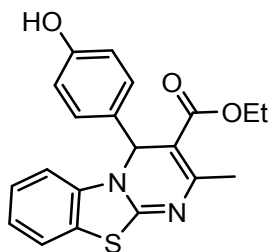

Pale yellow solid.  $^1\text{H}$  NMR (Acetone- $d_6$ , 400 MHz):  $\delta$  8.10-8.20 (m, 1H), 7.80-7.91 (m, 1H), 7.40-7.60 (m, 5H), 6.80-6.90 (m, 2H), 6.78 (s, 1H), 4.10-4.40 (m, 2H), 2.60 (s, 3H), 1.30 (m, 3H).  $^{13}\text{C}$  NMR (DMSO- $d_6$ , 400 MHz):  $\delta$  166.1, 162.8, 157.7, 153.9, 138.1, 132.6, 128.1, 127.1, 124.3, 123.2, 115.6, 70.2, 59.8, 56.6, 23.6, 14.5. IR (KBr): 3402, 2887, 1718, 1611, 1540, 1514, 1465, 1343, 1277, 1242, 1113, 963, 843  $\text{cm}^{-1}$ . mp: 210-212  $^\circ\text{C}$ .

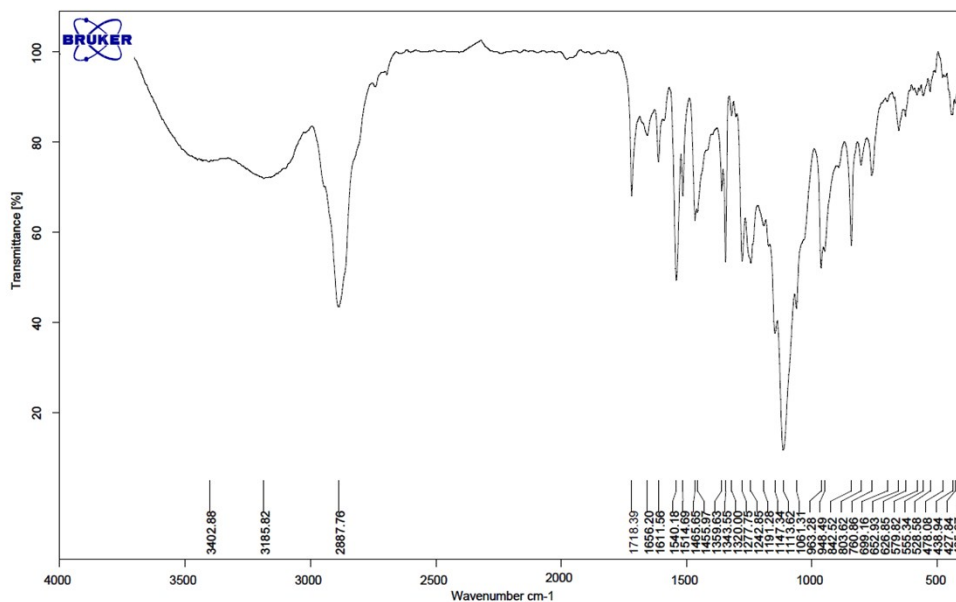

The FT-IR spectrum of product (IV<sub>e</sub>)

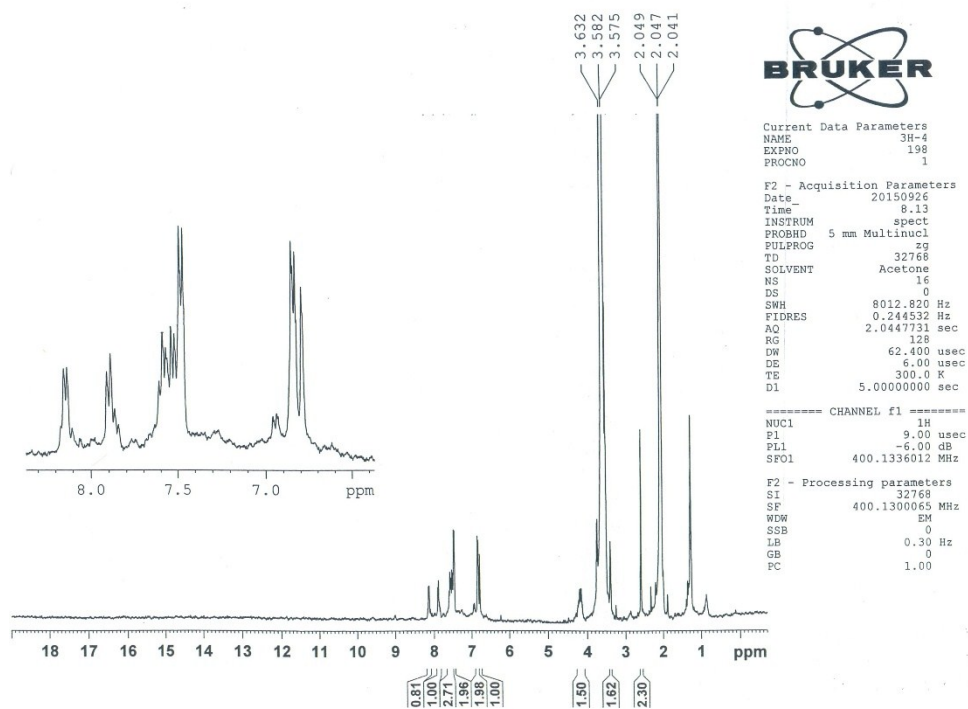

The <sup>1</sup>H NMR (400MHz) spectrum of product (IV<sub>e</sub>)

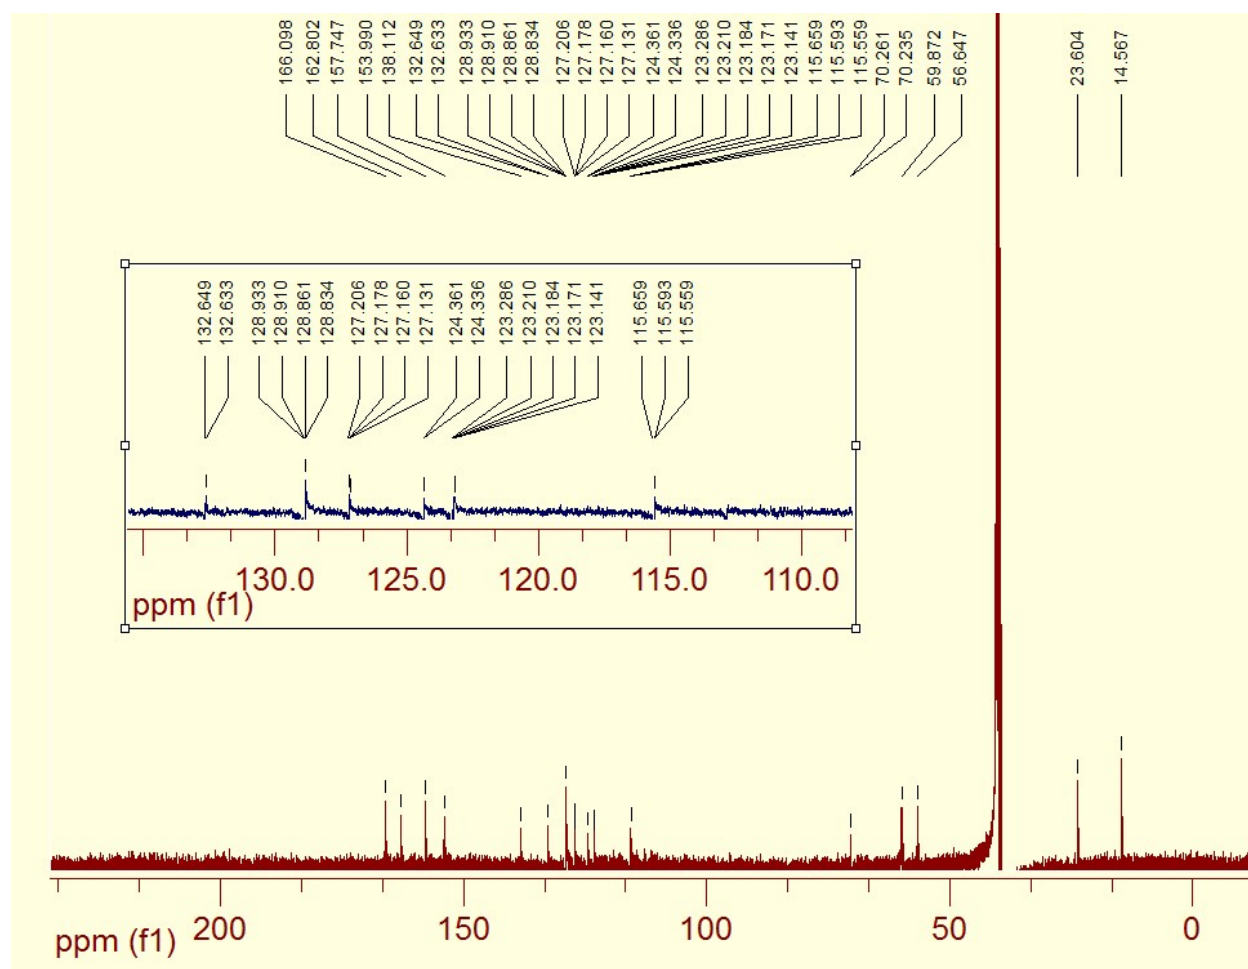

The  $^{13}\text{C}$  NMR (400MHz) spectrum of product (IV<sub>e</sub>)

**Ethyl-2-methyl-4-(2-nitrophenyl)-4*H*-pyrimido[2,1-*b*][1,3]benzothiazole-3-carboxylate**  
**(table 2, IV<sub>f</sub>).**

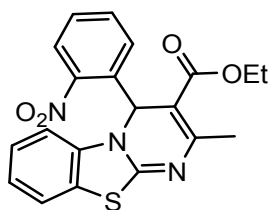

Red orange solid.  $^1\text{H}$  NMR (Acetone- $d_6$ , 400 MHz):  $\delta$  7.70 (m, 2H), 7.49 (d,  $J=8$  Hz, 1H), 7.30-7.38 (m, 3H), 7.27 (td,  $J=6.4, 1.2$  Hz, 1H), 7.22 (t,  $J=7.6$  Hz, 1H), 6.82 (s, 1H), 4.11 (q,  $J=7.2$  Hz, 2H), 2.37 (s, 3H), 1.20 (t,  $J=7.2$  Hz, 3H).  $^{13}\text{C}$  NMR (DMSO- $d_6$ , 400 MHz): 165.8, 164.1, 155.2, 146.1, 138.2, 136.8, 135.2, 130.3, 129.2, 127.7, 127.6, 124.8, 124.7, 123.3, 123.05, 122.2, 60.3, 52.5, 24.2, 14.5, IR (KBr): 2981, 1667, 1585, 1504, 1443, 1361, 1329, 1241, 1201, 1097, 743  $\text{cm}^{-1}$ . mp: 122-125  $^\circ\text{C}$ .

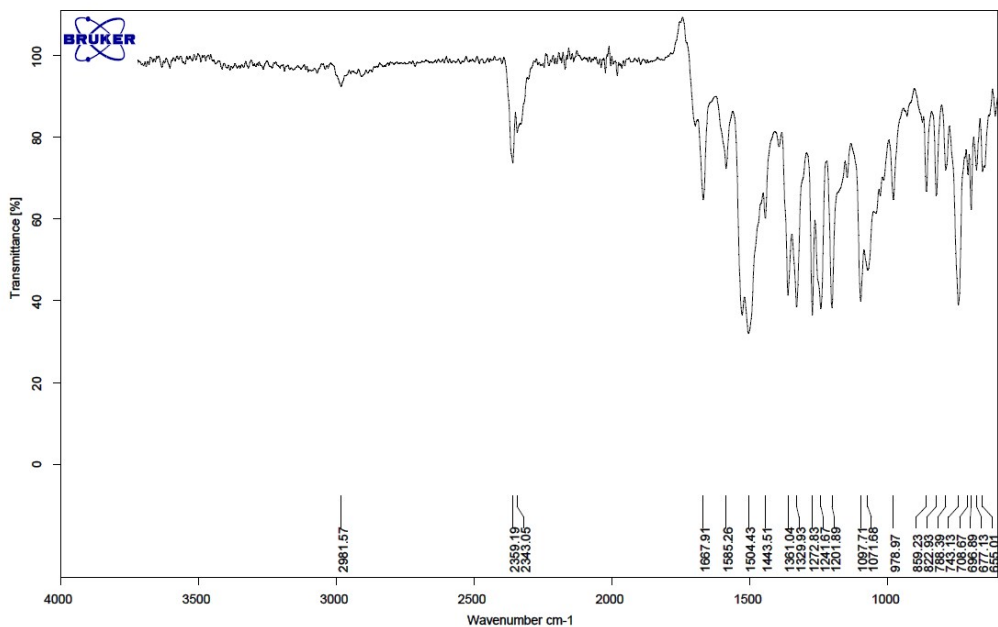

The FT-IR spectrum of product (IV<sub>f</sub>)

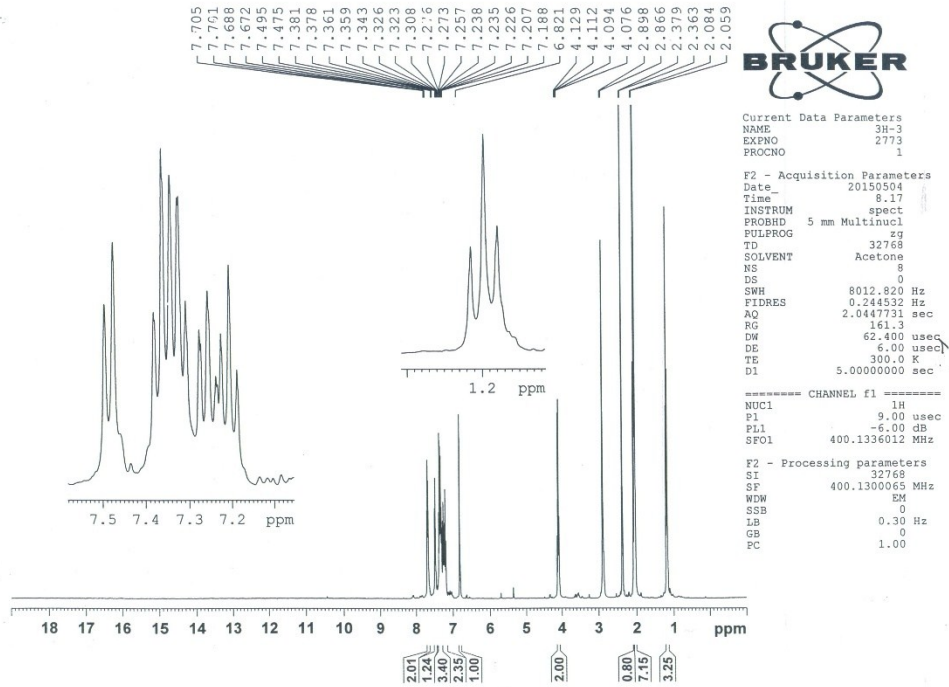

The  $^1\text{H}$  NMR (400 MHz) spectrum of product ( $\text{IV}_f$ )

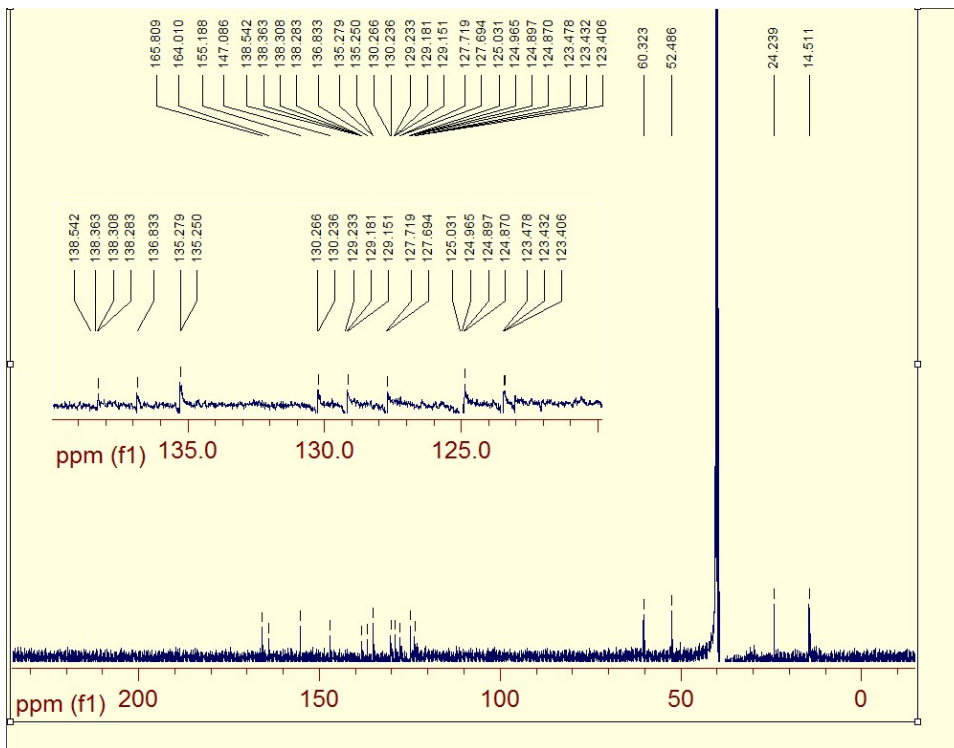

The  $^{13}\text{C}$  NMR (400MHz) spectrum of product ( $\text{IV}_f$ )



## Ethyl-2-methyl-4-(2-chlorophenyl)-4H-pyrimido[2,1-b][1,3]benzothiazole-3-carboxylate

(table 2, IV<sub>g</sub>).

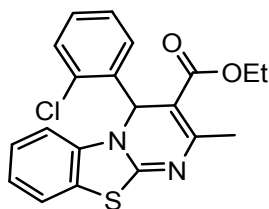

Yellow solid. <sup>1</sup>H NMR (Acetone-d<sub>6</sub>, 400 MHz): δ 7.94 (d, J=8 Hz, 1H), 7.84 (d, J=8 Hz, 1H), 7.74 (d, J=8 Hz, 1H), 7.67 (m, 1H), 7.49-7.54 (m, 2H), 7.38 (t, J=7.2 Hz, 1H), 7.25-7.31 (m, 2H), 3.97-3.99 (m, 1H), 4.01-4.15 (m, 1H), 2.30 (s, 1H), 1.2 (t, 3H). <sup>13</sup>C NMR (DMSO-d<sub>6</sub>, 400 MHz): 165.7, 163.1, 154.9, 139.5, 138.1, 131.3, 130.6, 130.1, 128.4, 127.2, 124.7, 123.4, 59.9, 55.2, 23.7, 14.5, IR (KBr): 2969, 1675, 1593, 1473, 1367, 1325, 1268, 1237, 1096, 746 cm<sup>-1</sup>. mp: 124-126 °C.

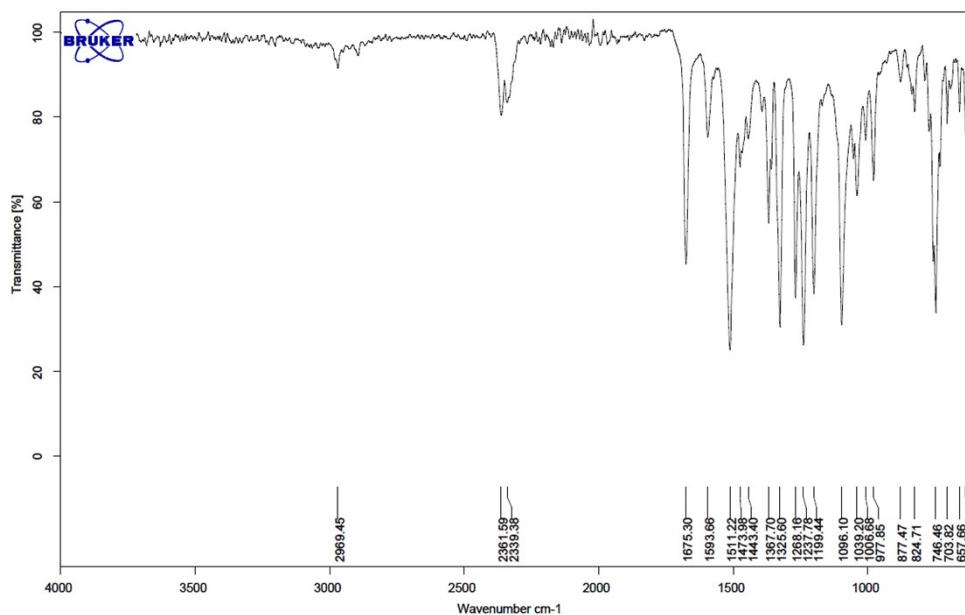

The FT-IR spectrum of product (IV<sub>g</sub>)

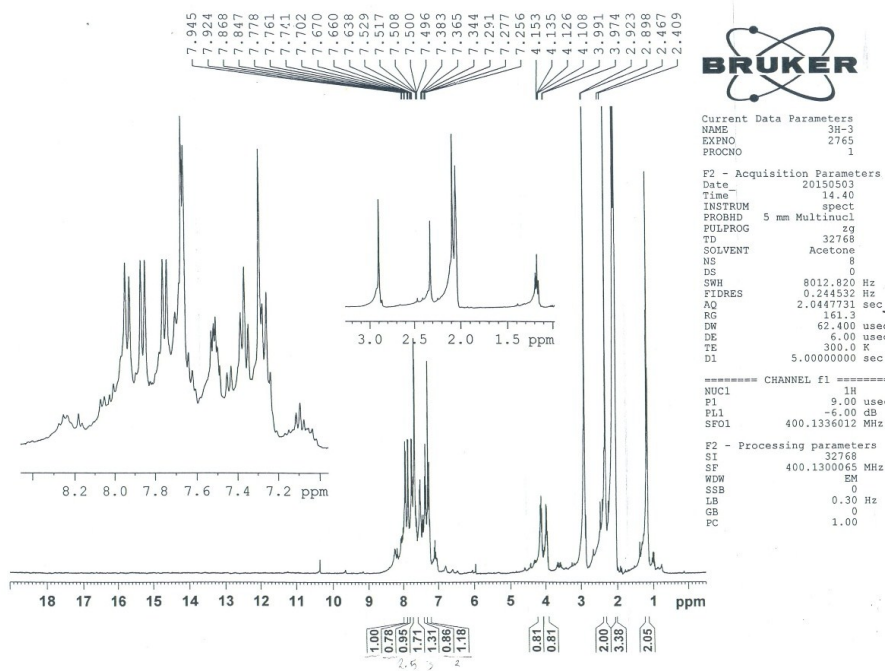

The <sup>1</sup>H NMR (400MHz) spectrum of product (IV<sub>g</sub>)

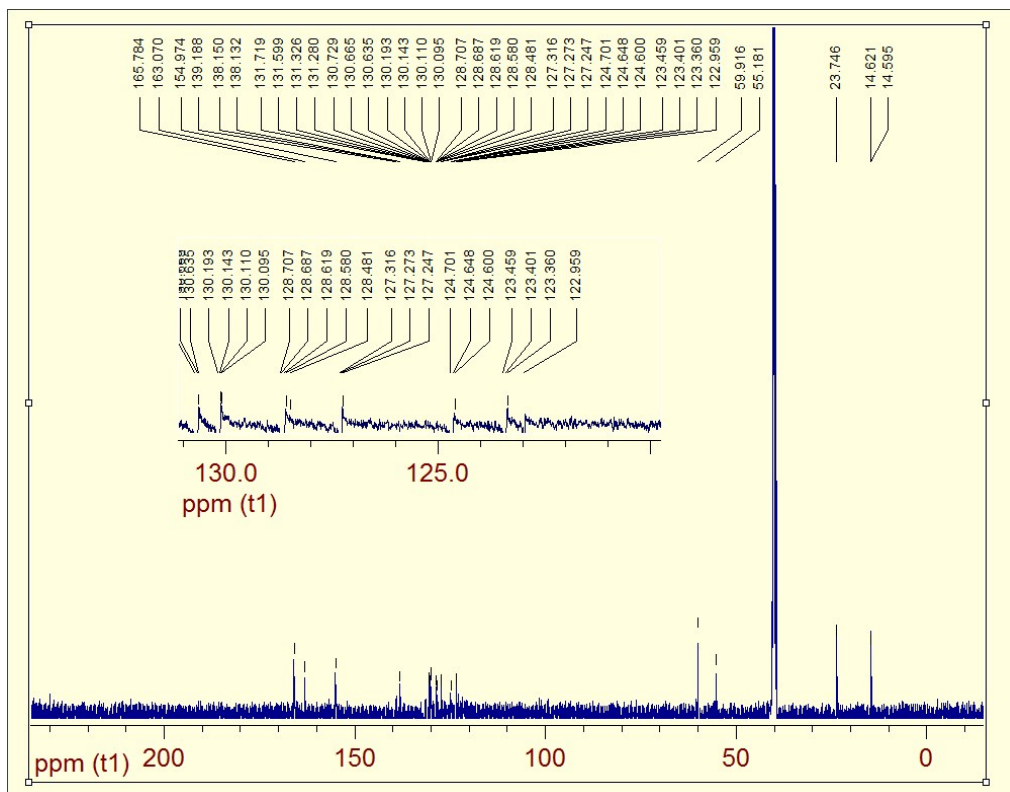

The <sup>13</sup>C NMR (400MHz) spectrum of product (IV<sub>g</sub>)

## Ethyl-2-methyl-4-(3-nitrophenyl)-4*H*-pyrimido[2,1-*b*][1,3]benzothiazole-3-carboxylate

(table 2, IV<sub>h</sub>).

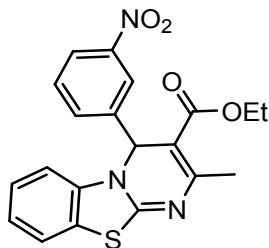

Light yellow solid. <sup>1</sup>H NMR (Acetone-*d*<sub>6</sub>, 400 MHz): δ 8.45 (s, 1H), 8.13 (d, *J*=8 Hz, 1H), 7.91 (d, *J*=8 Hz, 1H), 7.71 (d, *J*=8 Hz, 1H), 7.65 (t, *J*=8 Hz, 1H), 7.47 (d, *J*=8 Hz, 1H), 7.33 (t, *J*=8 Hz, 1H), 7.25 (t, *J*=8 Hz, 1H), 6.74 (s, 1H), 3.90-4.20 (m, 2H), 2.30 (s, 3H), 1.30 (m, 3H). <sup>13</sup>C NMR (DMSO-*d*<sub>6</sub>, 400 MHz): 165.7, 163.5, 155.6, 148.2, 144.0, 137.7, 133.8, 130.9, 127.4, 124.8, 123.7, 123.4, 123.2, 122.2, 112.8, 102.5, 60.1, 56.3, 23.8, 14.4, δ IR (KBr): 1654, 1581, 1500, 1343, 1273, 1247, 1205, 1098, 748 cm<sup>-1</sup>. M.P: 222-224 °C.

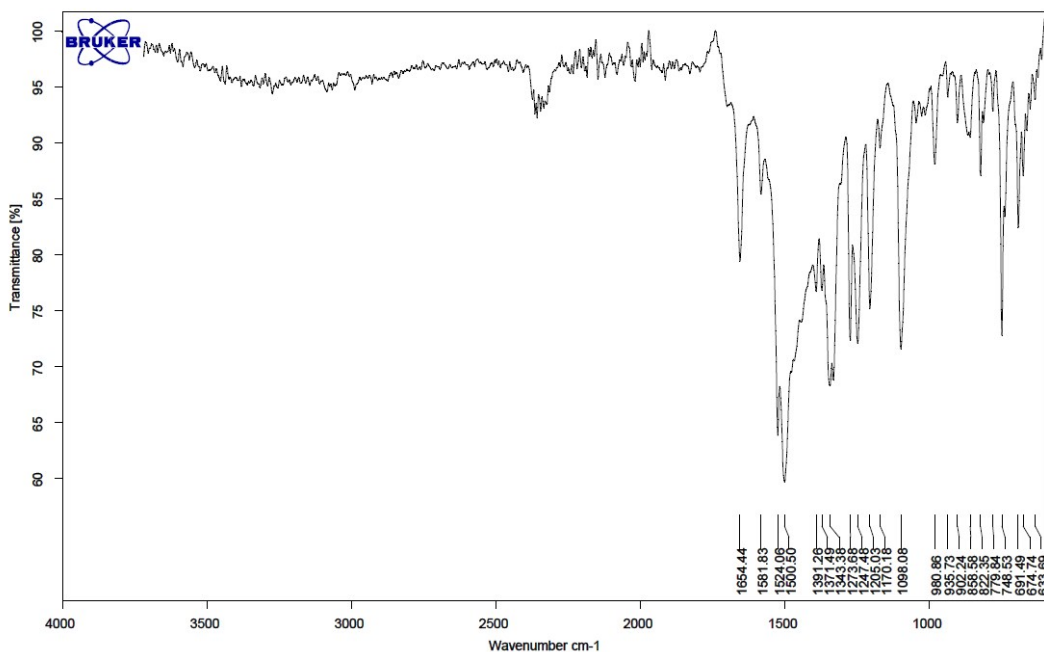

The FT-IR spectrum of product (IV<sub>h</sub>)

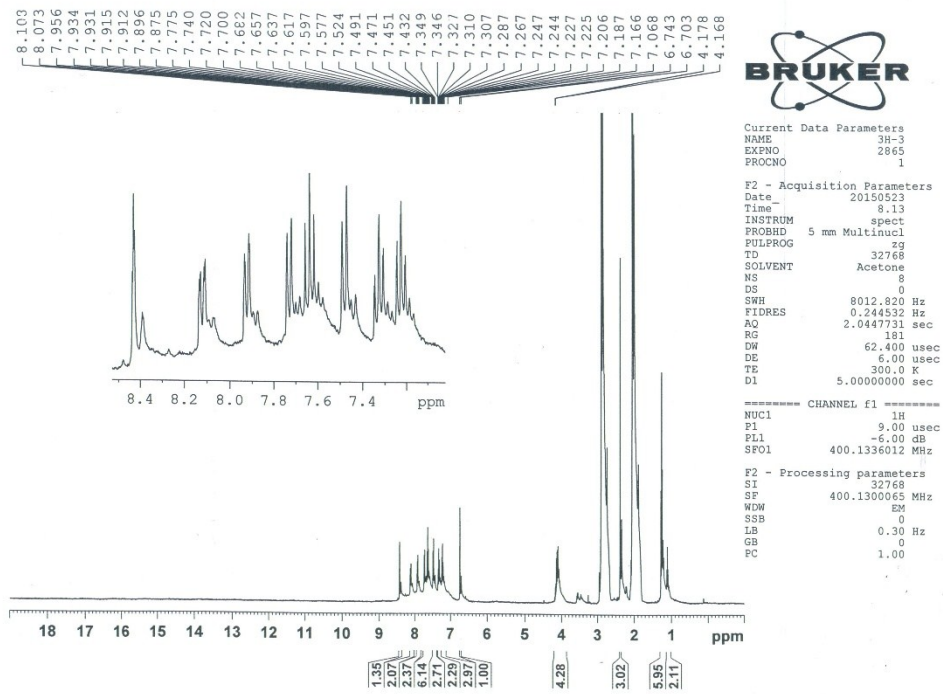

The <sup>1</sup>H NMR (400MHz) spectrum of product (IV<sub>h</sub>)

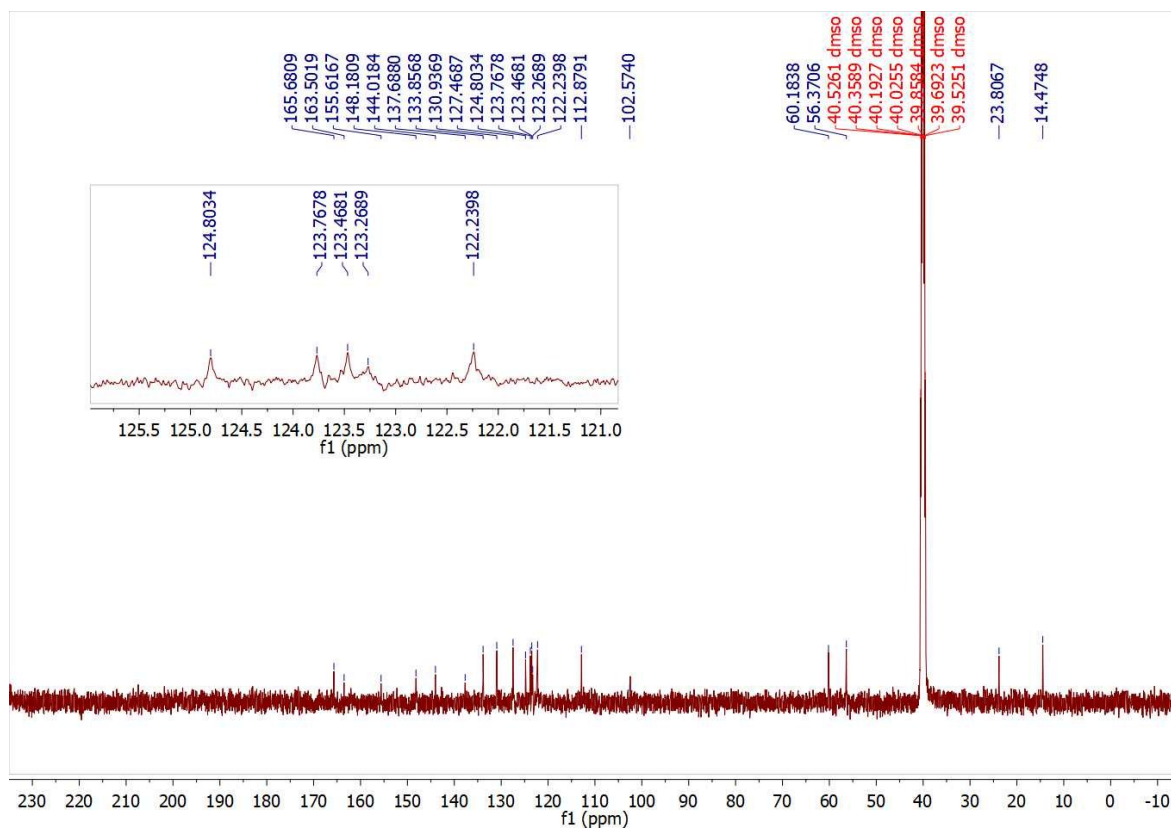

The  $^{13}\text{C}$  NMR (400MHz) spectrum of product (IV<sub>h</sub>)

**Ethyl-2-methyl-4-(3-hydroxy phenyl)-4*H*-pyrimido[2,1-*b*][1,3]benzothiazole-3-carboxylate (table 2, IV<sub>i</sub>).**

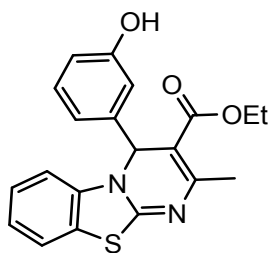

Yellow solid.  $^1\text{H}$  NMR (Acetone- $\text{d}_6$ , 400 MHz):  $\delta$  8.50 (s, 1H), 7.70 (m, 1H), 7.35 (m, 2H), 7.20 (m, 1H), 7.10 (m, 1H), 6.94 (m, 2H), 6.7 (m, 1H), 6.45 (s, 1H), 4.10 (q,  $J=7$  Hz, 2H), 2.33 (s, 3H), 1.27 (t,  $J=7$  Hz, 3H).  $^{13}\text{C}$  NMR (DMSO- $\text{d}_6$ , 400 MHz): 166.1, 163.1, 158.0, 154.3, 143.3, 138.1, 129.8, 127/2, 124.5, 123.3, 118.2, 115.8, 114.1, 112.8, 103.3, 59.9, 57, 23.6, 14.6, IR (KBr): 3227, 3063, 2980, 2925, 1687, 1600, 1511, 1458, 1275, 1243, 1213, 1100, 788  $\text{cm}^{-1}$ . mp: 260-263  $^\circ\text{C}$ .

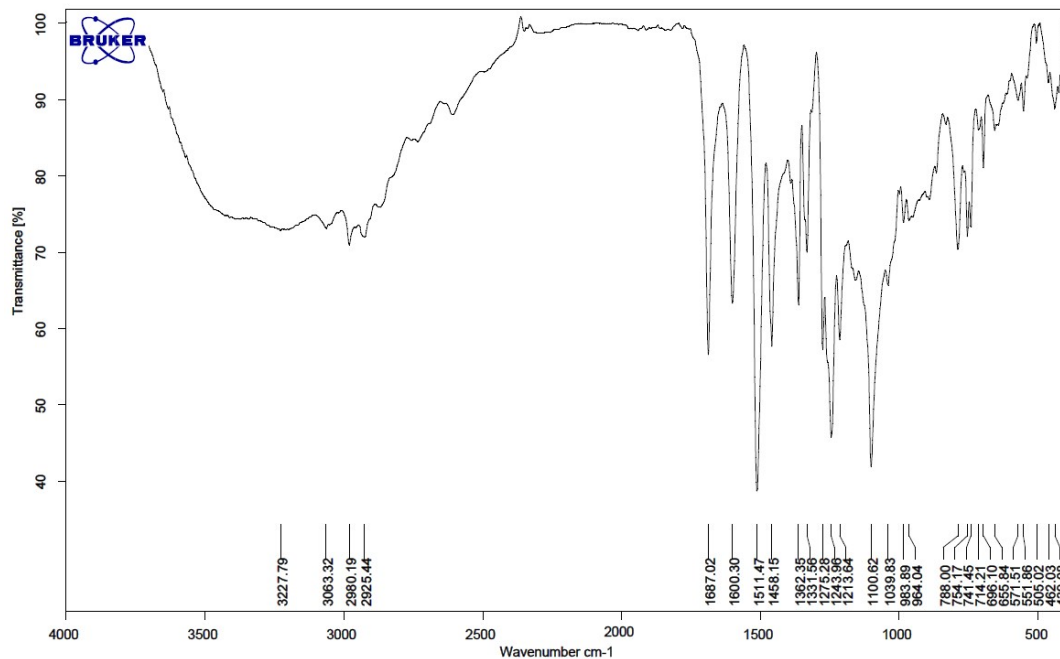

The FT-IR spectrum of product (IV<sub>i</sub>)

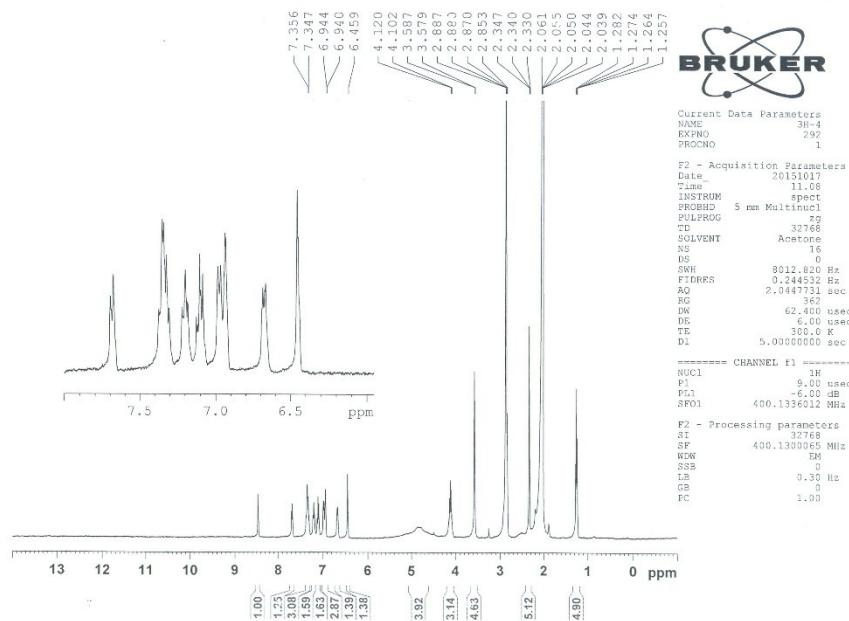

The <sup>1</sup>H NMR (400MHz) spectrum of product (IV<sub>i</sub>)

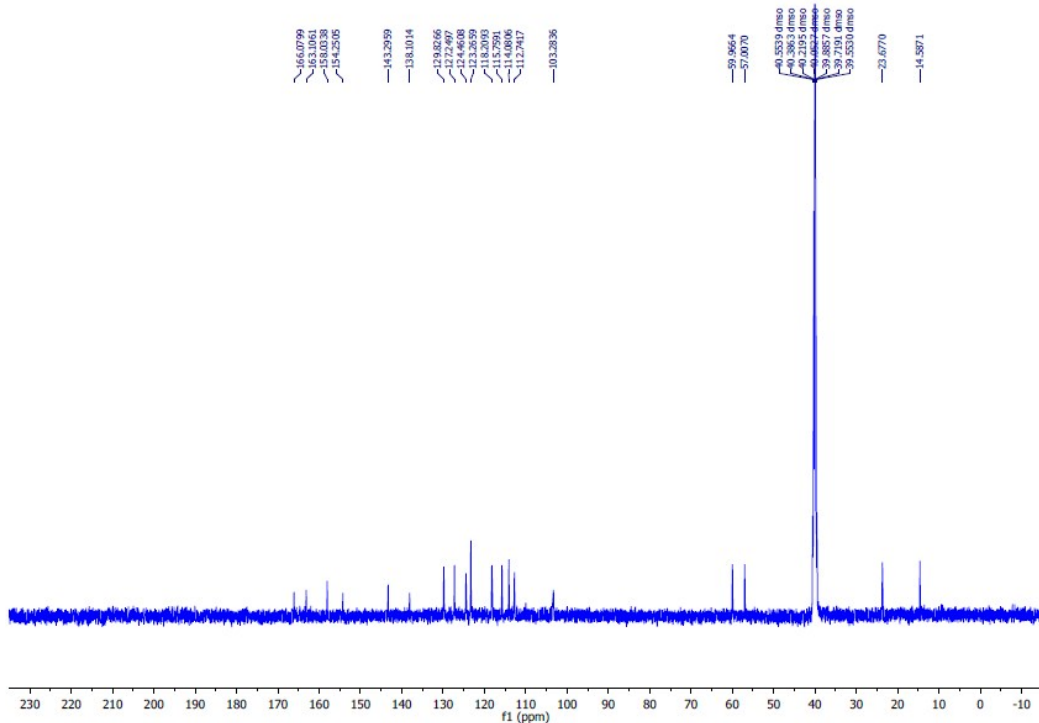

The  $^{13}\text{C}$  NMR (400MHz) spectrum of product (IV<sub>j</sub>)

**Ethyl-2-methyl-4-(2,4-dichlorophenyl)-4*H*-pyrimido[2,1-*b*][1,3]benzothiazole-3-carboxylate**  
(table 2, IV<sub>j</sub>).

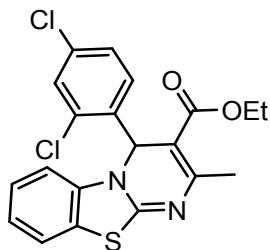

Yellow solid.  $^1\text{H}$  NMR (Acetone- $\text{d}_6$ , 400 MHz):  $\delta$  7.69-7.72 (m, 2H), 7.33-7.46 (m, 4H), 7.22 (t,  $J=7.6$  Hz, 1H), 6.82 (s, 1H), 4.11 (q,  $J=6.8$  Hz, 2H), 2.37 (s, 3H), 1.20 (t,  $J=6.8$  Hz, 3H).  $^{13}\text{C}$  NMR (DMSO- $\text{d}_6$ , 400 MHz): 165.6, 163.1, 155.3, 137.9, 134.3, 132.5, 129.5, 128.8, 127.3, 127.2, 124.7, 123.4, 122.9, 59.9, 54.9, 23.8, 14.6, IR (KBr): 3007, 2971, 1698, 1583, 1490, 1360, 1242, 1201, 1076, 845, 743  $\text{cm}^{-1}$ . M.P: 133-135  $^\circ\text{C}$ .

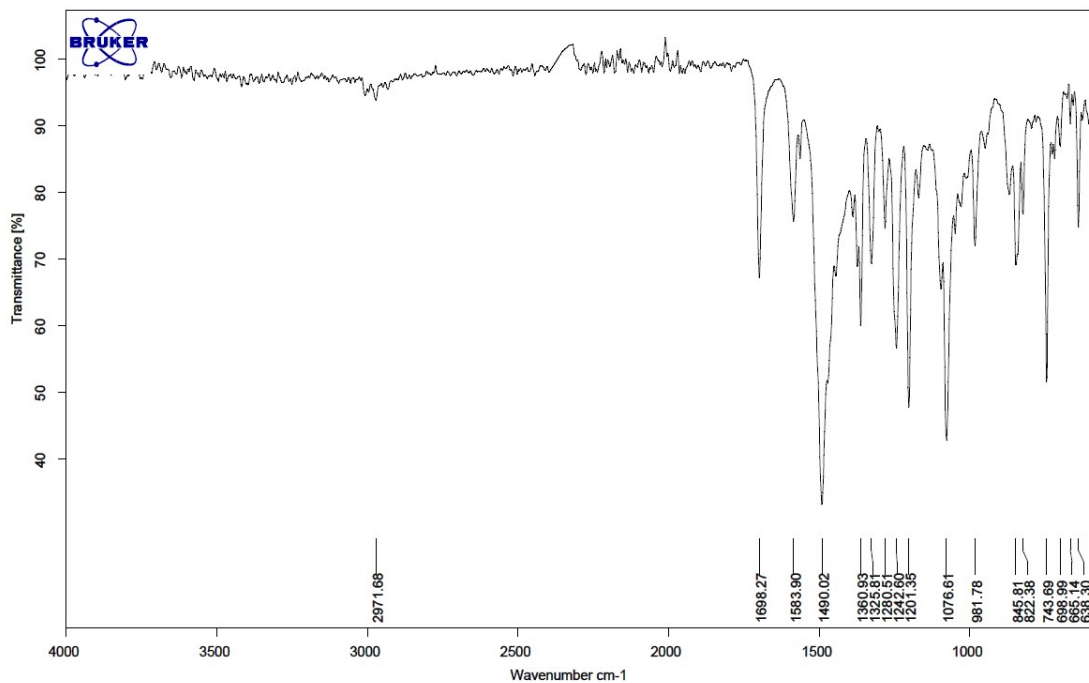

The FT-IR spectrum of product (IV<sub>j</sub>)

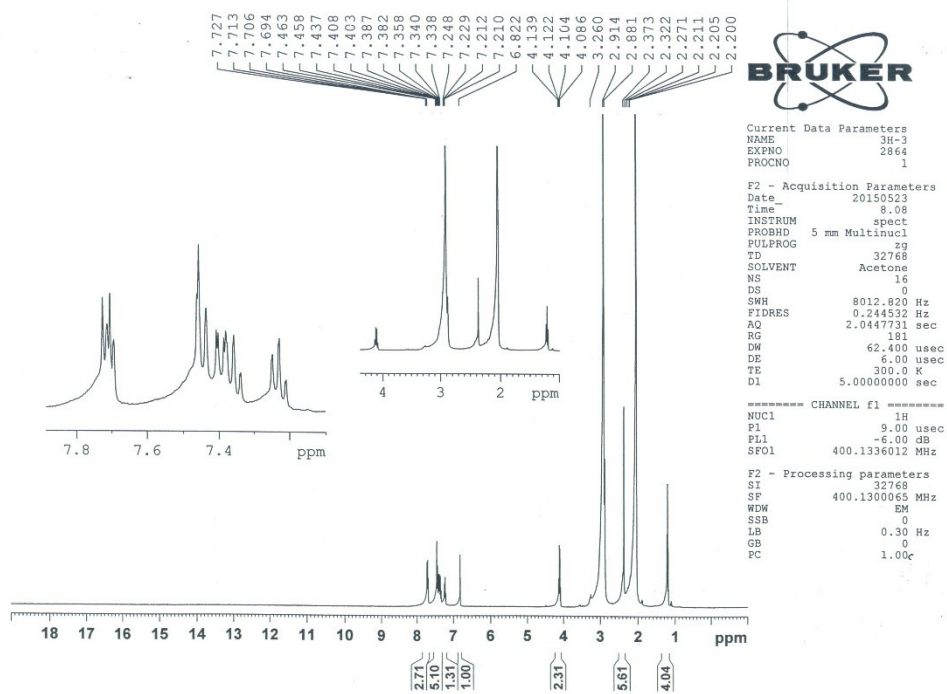

The <sup>1</sup>H NMR (400MHz) spectrum of product (IV<sub>j</sub>)





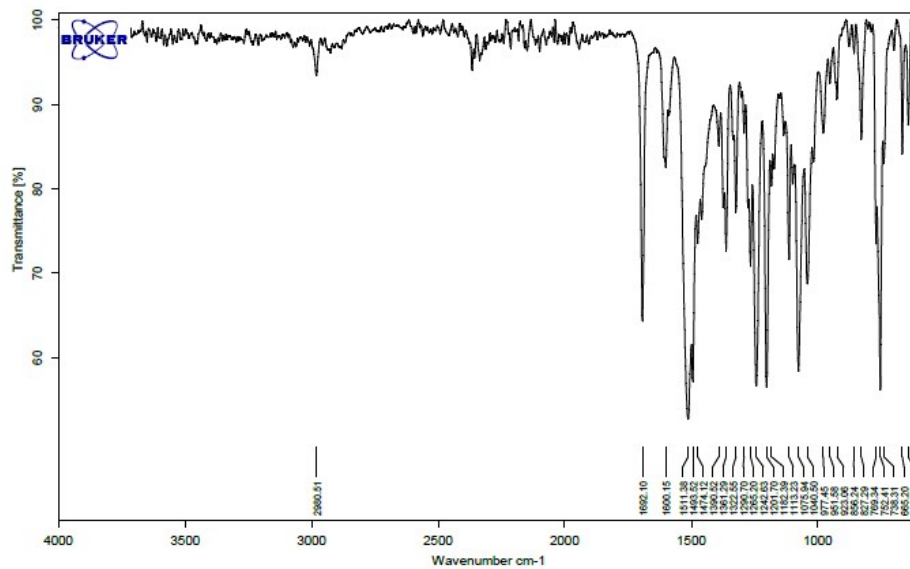

The FT-IR spectrum of product (IV<sub>k</sub>)

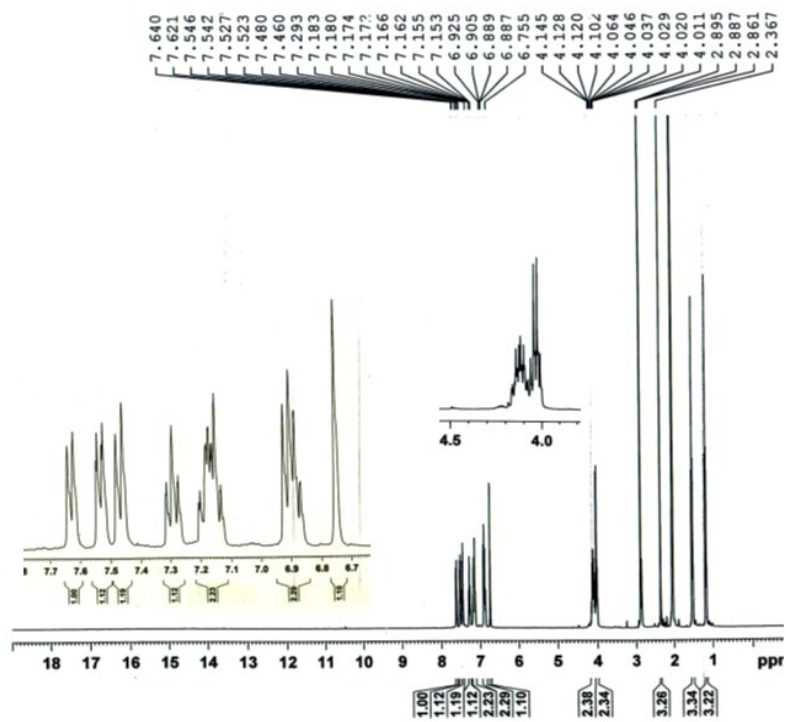

The <sup>1</sup>H NMR (400MHz) spectrum of product (IV<sub>k</sub>)

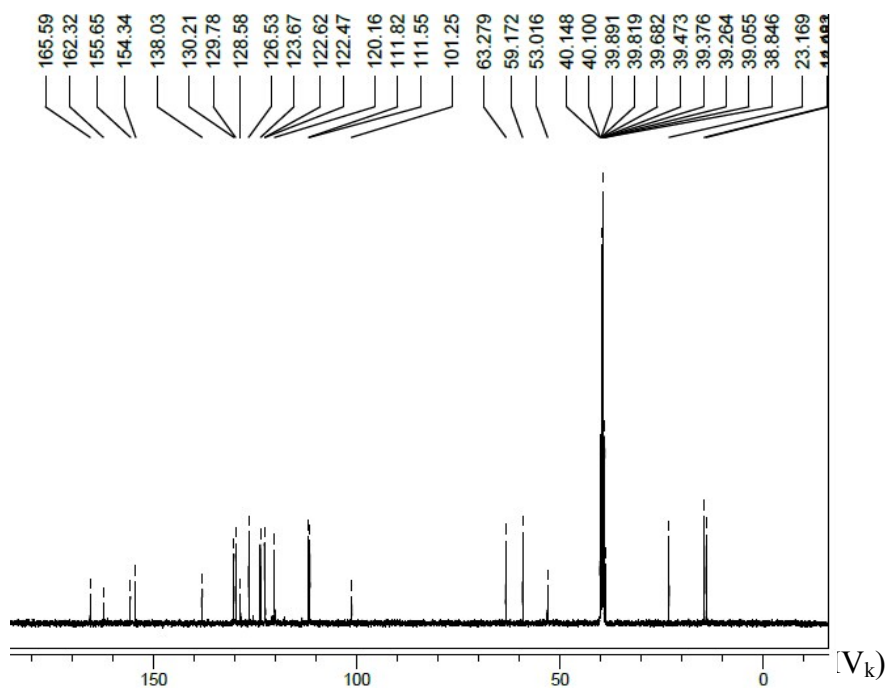

**Ethyl-2-methyl-4-(3,4-dihydroxyphenyl)-4H-pyrimido[2,1-b][1,3]benzothiazole-3-carboxylate (table 2, IV<sub>1</sub>).**

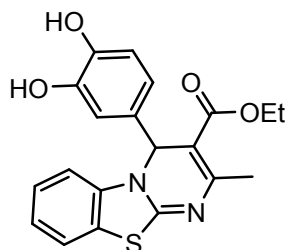

Gray solid. <sup>1</sup>H NMR (Acetone-d<sub>6</sub>, 400 MHz): δ 8.30 (s, 1H), 7.91 (s, 1H), 7.64 (d, *J*=7.6 Hz, 1H), 7.37 (d, *J*=8 Hz, 1H), 7.32 (t, *J*=7.6 Hz, 1H), 7.19 (t, *J*=7.6 Hz, 1H), 6.94 (s, 1H), 6.87 (d, *J*=8 Hz, 1H), 6.71 (d, *J*=8 Hz, 1H), 6.37 (s, 1H), 4.12 (q, *J*=7.2 Hz, 2H), 2.33 (s, 3H), 1.20 (t, *J*=7.2 Hz, 3H). <sup>13</sup>C NMR (DMSO-d<sub>6</sub> and CDCl<sub>3</sub>, 400 MHz): 166.2, 162.7, 153.6, 145.9, 145.7, 138.2, 133.0, 127/1, 124.3, 123.3, 123.2, 118.9, 115.4, 114.6, 112.8, 59.8, 56.8, 23.6, 12.4, IR (KBr): 3380, 2981, 1661, 1595, 1507, 1446, 1274, 1252, 1211, 1100, 753 cm<sup>-1</sup>. mp: 225-227 °C.

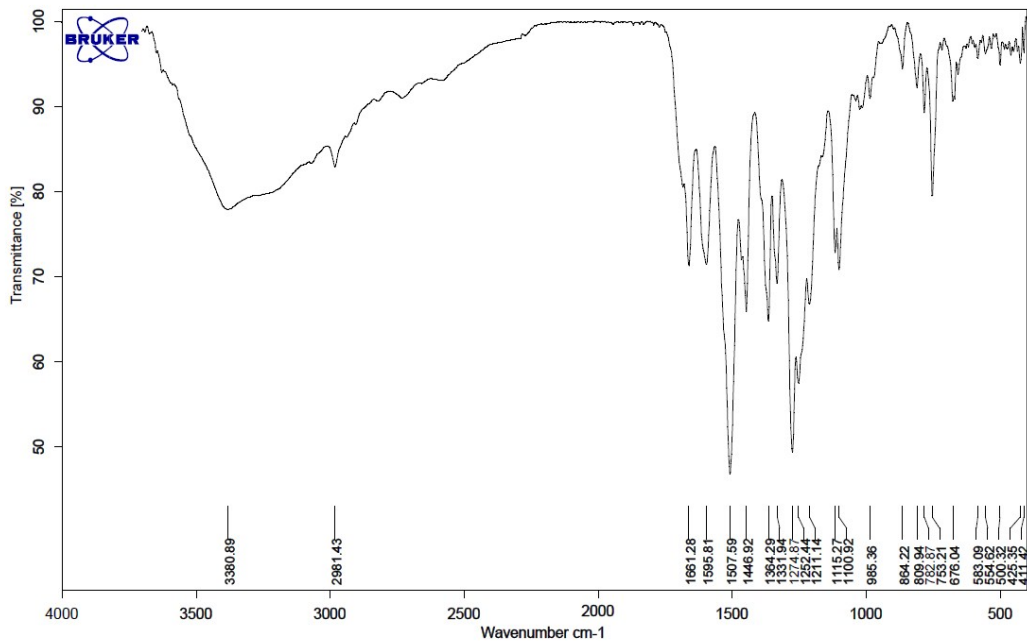

The FT-IR spectrum of product (IV<sub>1</sub>)

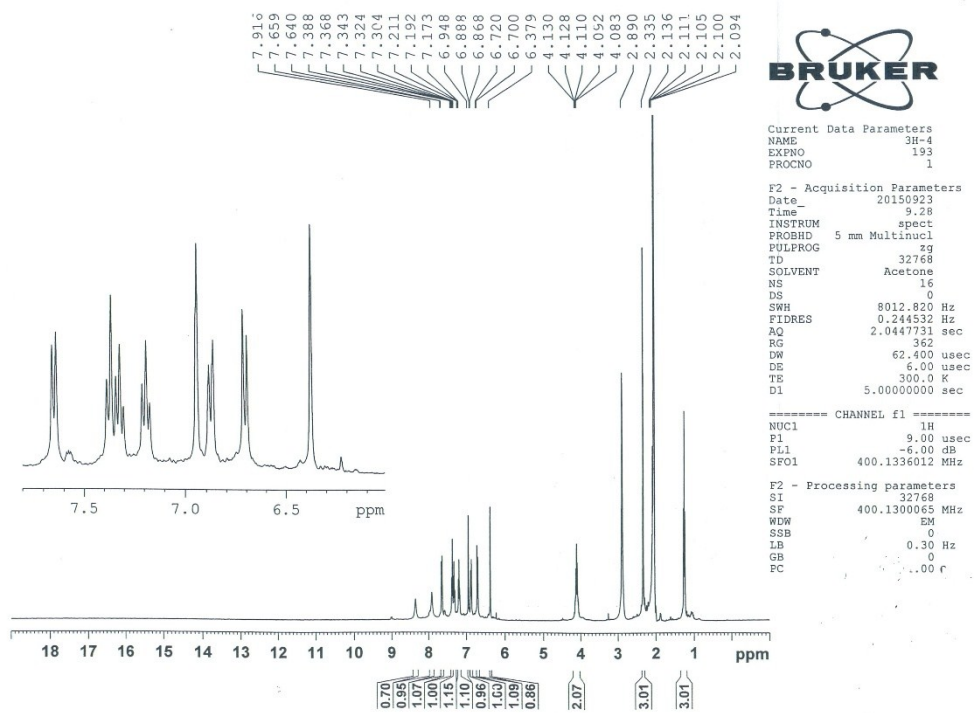

The <sup>1</sup>H NMR (400MHz) spectrum of product (IV<sub>1</sub>)

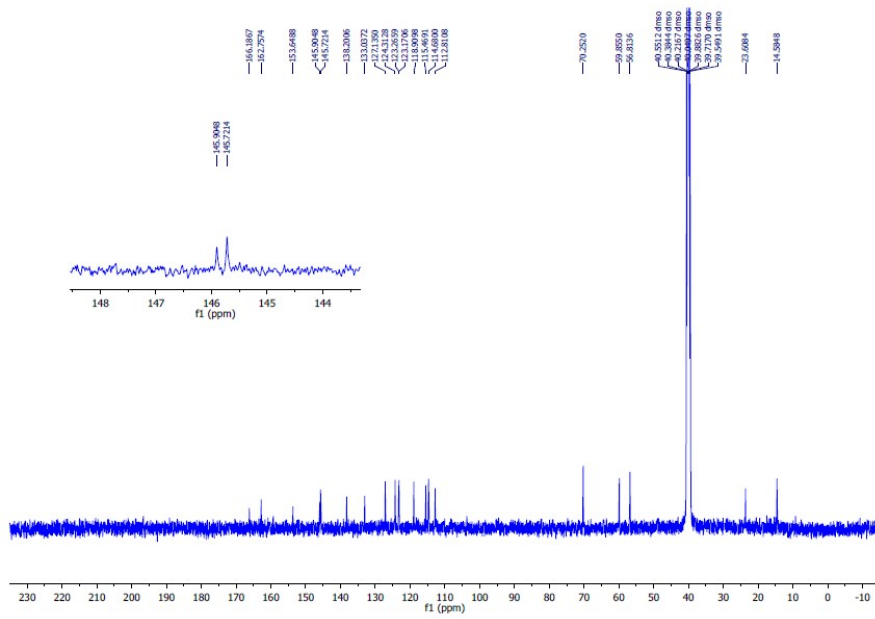

The  $^{13}\text{C}$  NMR (400MHz) spectrum of product (IV<sub>1</sub>)
